# Supplementary material for: Polygenic Sex Determination System in Zebrafish
Source: PLoS One. 2012 Apr 10;7(4):e34397. doi: 10.1371/journal.pone.0034397 (PMC3323597; doi:10.1371/journal.pone.0034397)
Supplement: Table S1 — Data tables for rearing density experiment 1 and 2. (XLSX) [file pone.0034397.s005.xlsx]

## Sheet: Experiment 1
date born	day 5	day 10	day 20	day 30	day 40	day 50	final count	number of males	number of females	percent males	percent dead	Average final density	Average percent male	Standard Deviation	Average percent dead
2003-04-18	100	88	77	75	75	75	72	29	43	0.402778	0.28	62.5	0.464799	0.177066	0.375
2003-06-22	100	93	79	78	78	NA	75	30	45	0.4	0.25
2003-06-29	100	95	73	71	70	NA	66	17	49	0.257576	0.34
2003-06-29	100	92	79	79	78	NA	77	23	54	0.298701	0.23
2003-07-01	100	97	84	79	79	NA	78	37	41	0.474359	0.22
2003-07-01	100	98	79	77	74	NA	70	40	30	0.571429	0.3
2003-07-09	100	95	66	65	63	NA	62	37	25	0.596774	0.38
2003-07-09	100	87	47	47	42	NA	41	14	27	0.341463	0.59
2003-07-11	100	98	68	63	63	NA	55	28	27	0.509091	0.45
2003-07-11	100	88	45	43	42	NA	42	11	31	0.261905	0.58
2003-07-11	100	92	62	58	57	NA	55	11	44	0.2	0.45
2003-07-31	100	97	94	28	27	NA	27	9	18	0.333333	0.73
2003-08-03	100	102	91	85	84	NA	81	56	25	0.691358	0.19
2003-08-03	100	97	91	86	85	NA	71	49	22	0.690141	0.29
2003-08-04	100	97	73	62	61	NA	61	44	17	0.721311	0.39
2003-08-04	100	97	82	67	67	NA	67	46	21	0.686567	0.33
2003-04-18	50	44	31	30	30	30	29	2	27	0.0689655	0.42	36	0.303406	0.14784	0.303406
2003-04-18	50	46	13	11	11	11	11	2	9	0.181818	0.78
2003-06-29	50	45	42	40	42	NA	38	11	27	0.289474	0.24
2003-06-29	50	50	39	39	40	NA	37	11	26	0.297297	0.26
2003-06-29	50	55	47	47	46	NA	47	8	39	0.170213	0.06
2003-07-01	50	52	49	49	49	NA	49	10	39	0.204082	0.02
2003-07-01	50	49	44	41	41	NA	40	11	29	0.275	0.2
2003-07-11	50	47	39	38	37	NA	36	13	23	0.361111	0.28
2003-07-11	50	40	34	35	34	NA	31	10	21	0.322581	0.38
2003-07-11	50	46	45	44	44	NA	38	13	25	0.342105	0.24
2003-07-31	50	42	41	37	38	NA	35	19	16	0.542857	0.3
2003-08-04	50	46	45	42	42	NA	41	24	17	0.585366	0.18
2003-06-29	25	26	23	23	23	NA	23	6	17	0.26087	0.08	18.4286	0.265908	0.106755	0.262857
2003-06-29	25	19	15	15	15	NA	15	1	14	0.0666667	0.4
2003-07-09	25	25	17	18	18	NA	18	2	16	0.111111	0.28
2003-07-09	25	22	19	19	19	NA	19	3	16	0.157895	0.24
2003-07-09	25	23	17	15	14	NA	13	4	9	0.307692	0.48
2003-07-11	25	23	13	13	13	NA	12	5	7	0.416667	0.52
2003-07-31	25	19	17	17	17	NA	17	4	13	0.235294	0.32
2003-07-31	25	19	18	17	17	NA	16	4	12	0.25	0.36
2003-07-31	25	19	17	17	17	NA	15	5	10	0.333333	0.4
2003-07-31	25	20	19	18	17	NA	15	3	12	0.2	0.4
2003-08-03	25	25	26	24	24	NA	22	7	15	0.318182	0.12
2003-08-03	25	24	24	24	24	NA	24	7	17	0.291667	0.04
2003-08-04	25	25	25	25	25	NA	24	8	16	0.333333	0.04
2003-08-04	25	26	25	25	25	NA	25	11	14	0.44	0
									Average:	0.35239	0.310476

## Sheet: Experiment 2
date born	day 5	day 10	day 20	day 30	day 40	day 50	final count	numbers of males	number of females	percent males	percent dead	Average final density	Average percent male	Standard deviation	Average percent dead
2004-04-05	100	100	86	NA	NA	NA	81	63	18	0.777778	0.19	61.2	0.641704	0.132607	0.388
2004-04-11	100	83	65	NA	NA	NA	52	36	16	0.692308	0.48
2004-04-11	100	86	72	NA	NA	NA	68	47	21	0.691176	0.32
2004-05-07	100	95	94	91	NA	NA	76	49	27	0.644737	0.24
2004-05-07	100	85	75	75	NA	NA	71	51	20	0.71831	0.29
2004-06-04	100	93	64	53	NA	NA	53	27	26	0.509434	0.47
2004-06-04	100	87	75	68	NA	NA	67	32	35	0.477612	0.33
2004-06-04	100	83	69	45	NA	NA	39	16	23	0.410256	0.61
2004-08-07	100	95	70	68	NA	NA	64	52	12	0.8125	0.36
2004-11-17	100	75	47	45	NA	NA	41	28	13	0.682927	0.59
2004-04-05	50	50	46	NA	NA	NA	46	22	24	0.478261	0.08	31.9	0.442498	0.151457	0.362
2004-04-11	50	43	37	NA	NA	NA	35	26	9	0.742857	0.3
2004-04-11	50	44	36	NA	NA	NA	34	18	16	0.529412	0.32
2004-05-07	50	47	24	16	NA	NA	16	5	11	0.3125	0.68
2004-05-07	50	42	36	33	NA	NA	32	20	12	0.625	0.36
2004-06-04	50	45	38	34	NA	NA	33	19	14	0.575758	0.34
2004-06-04	50	44	32	27	NA	NA	27	11	16	0.407407	0.46
2004-06-04	50	46	44	39	NA	NA	38	16	22	0.421053	0.24
2004-08-07	50	49	40	40	NA	NA	37	28	9	0.756757	0.26
2004-11-17	50	41	24	21	NA	NA	21	8	13	0.380952	0.58
2004-04-05	25	23	22	NA	NA	NA	22	7	15	0.318182	0.12	15.6	0.432394	0.18065	0.376
2004-04-11	25	26	21	NA	NA	NA	18	9	9	0.5	0.28
2004-04-11	25	23	17	NA	NA	NA	14	10	4	0.714286	0.44
2004-05-07	25	18	14	13	NA	NA	13	9	4	0.692308	0.48
2004-05-07	25	10	7	6	NA	NA	6	2	4	0.333333	0.76
2004-06-04	25	18	16	13	NA	NA	14	4	10	0.285714	0.44
2004-06-04	25	23	17	17	NA	NA	16	6	10	0.375	0.36
2004-06-04	25	24	24	24	NA	NA	24	10	14	0.416667	0.04
2004-08-07	25	22	16	16	NA	NA	14	11	3	0.785714	0.44
2004-11-17	25	21	21	21	NA	NA	15	7	8	0.466667	0.4
									Average:	0.551162	0.375333
